# Supplementary material
Source: PubMed Central journal article supplement (PMC2034266)
Supplement: pnas_0704843104_2.pdf [file pnas_0704843104_2.pdf]


  
**TraR<sub>NGR</sub>** : ---MSVNGNLRSLIDMEEAAQDGHMFKIALRSFAHSCGYDRFAYLQKDGTF---QVRTFHSYFGFWESIYLGSDYFNIIDPVLAEAKR : 80  
**TraR<sub>At</sub>** : ----MOHWLDKLTDLAAIEGDECILKKTGLADIADHFCFTGYAYLHIQHR----HITAVTNYHROWQSTYFDKKEALDPVVKRARS : 78  
**LuxR** : --MNIKNINANEKIIDKIKTCNNNKLDINQOLSEIAKIIHCEYMLEAIIYPHSIIKPDVSIIDNYEKKRWKYDDAGLLEYDPVVDYSKS : 87  
**LasR** : ----MALVDGFLELERSSGKLEWSAILQKMASDLCFSKILFGLLPKDSQDYENAFIVGNYEAAWREHYDRAGYARVDPTVSHCTC : 81  
**RhIR** : MRNDGGFLLWWDGLRSEMQPIHDSQGFVAVLEKEVRRLLGFDYIYAGVRHTIIPFTRPKTEVHGTYFKAWLERYQMCNIGAVDPAILNGLR : 89  
**EsaR** : ----MFSFFLENGCTITDITQTYIKRKLSPGSPDYATVTVSKK--NPSNMLIISSEYDEWIRIRYRANNEQHTDPVILTAFK : 75  
**ExpR** : ----MISISFNVDFINSTIQSYLNRLKLSYCDPKYAYLIMNKK--KPTDVVISNYETEWVDIYRNNEQHLDPVILTAIN : 75  
**CerR** : ----MDIIDLSTVATDDASFLDYIDQLCQKLGFDYASYATTSP--MTGAVQGYANYEDSWKMHYMRRLHRVDPTIHKSAI : 75

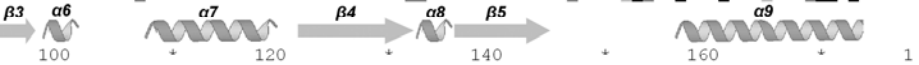
  
**TraR<sub>NGR</sub>** : RRDVFFWTADAWPARGSSPLRRFRDEAISHGIRCGVITIPVEGSYGSAMMLTFASP-ERKVDISGVLDPKKAQQLMMHYQLK---- : 162  
**TraR<sub>At</sub>** : RKHIFTWGEHERPTLSKDERAFYDHSDFGIRS-GITIPIKTANGFMSVFTMASD-KPVIDLDREIDAVAAAAATIGCHAHARIS---- : 160  
**LuxR** : HHSFINWNVFEKTIKIKES-PNVIKEAQESGLIT-GFSFPIHTASNGFGMLSFHAHSDKDIYTDLSLFLHASTNVPLMLPSLVDN---- : 168  
**LasR** : SVLPIFWEPSIYQTRKQCH---EFEBASAAGLAVY-GLTMLPHGARGELGALSVEAEANRAENRFMESVLPRTLWMLKDYALQS---- : 166  
**RhIR** : SSEMVVMSDSLFDQSR---MLWNEARDWGLCV-GATLPIRAPNNLLSVLSVARDCQNISSFEREERLRLRCMIELITQOKLT---- : 167  
**EsaR** : RTSFFAWDENITLMSDLRF-TKIFLSLQYNIIVN-GFTYVLDHDMNNLALLSVI IKGNDQTALEQRFAAECGTMQMLLIDFNEQMYRLA : 162  
**ExpR** : KISPFSDDDDLVSSKLF-SRIFNLSKDYDIVN-GYTFVLHSPGNLALALSFMIEEHRSEELEEITQNNKDKLQMLLSAHEKLTSLY : 162  
**CerR** : SIAPVDSR---FERDERF-RAVFAAEDEFGITPQGLTVFVRGYPYDGRGLLSVTRN-CARPEWEKHKRAVIGELQVAVHLHD---- : 153


  
**TraR<sub>NGR</sub>** : ----IIAAKTVLNPCKMLSFREMLGLVWASKGKTASVTANLITGYNARIVQHYLDKARAKLDAESVPQLVAIAKDRGIV---- : 236  
**TraR<sub>At</sub>** : ----FLRTPPTAEDAANLDEKEATYLRWIAVGKTMEEIALVEGVKYNVSRVKLREAMKRFVDVRSKAHLTALAIRKLI---- : 234  
**LuxR** : ----YQKINTTRKSDSILTKREKELAWASEGKSTWDISKILGCCSERIVTFHLTNTQMKLNTNRCQSTSKAILTGAINCPYLK---- : 249  
**LasR** : ---GAGLAFEHPVSKPVVLTSSREKEVLCWCAIGKTSWEISVICNCSEANVNFHMGNIIRKFGVTSRRVAAIMAVNLGLITL---- : 239  
**RhIR** : --DLEHPMLMSN---PVCLSHREREILQWTADGKSSGEIAIILSTSESTVNFHKNIQKFKDAPNKTLLAAAYAAALGLI---- : 241  
**EsaR** : GTEGERAPALNCSADKTIISSRFENEVYVWASMGKTYAEIAAATIGISVSVVVKFHIKNVVVKLGVSNAQAIRLGVELDIRPAASAAR-- : 249  
**ExpR** : -REMSRNRNNSKSEQADLFSRENEIILHWASMGKTYQEIAIILGITTSTVVKFHIKNVVVKLGVLNAKHAIRLGVEMNLIKVPVPAKARS : 250  
**CerR** : --AVMRSDVISRALRQPRLESTREIENVLQWAAAGKSTDIDGLLIGISHRITVEVHILRSAREKLGTLSTVQAVGRAIGLGLVYFR---- : 233
