# Supplementary material
Source: PubMed Central journal article supplement (PMC2034266)

**A**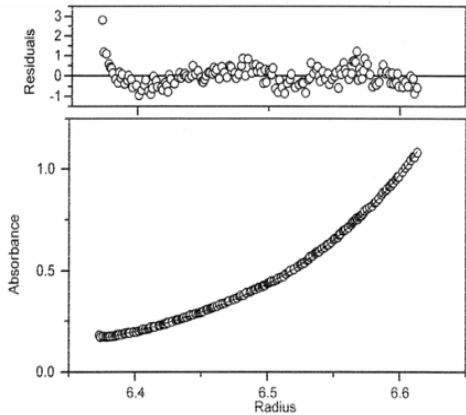**B**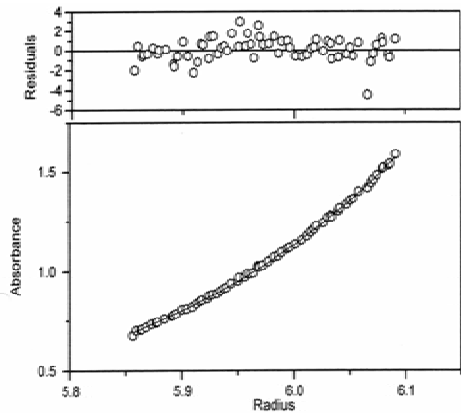

Supplement: pnas_0704843104_1.pdf [file pnas_0704843104_1.pdf]
